# Supplementary material for: Prolific intercalation of VO2 (D)/polypyrrole/g-C3N4 as an energy storing electrode with remarkable capacitance
Source: Royal Society of Chemistry journal article supplement (doi:10.1039/d2nj02401b), 2022-01-01

## Supplementary Data

Manuscript Number: NJ-ART-05-2022-002401

### Prolific intercalation of VO<sub>2</sub> (D)/polypyrrole/g-C<sub>3</sub>N<sub>4</sub> as an energy storing electrode with remarkable capacitance

Monika Dhanda<sup>1</sup>, Rajat Arora<sup>1</sup>, Meenu Saini<sup>3</sup>, S. P. Nehra<sup>2</sup>, Suman Lata<sup>1\*</sup>

<sup>1</sup>Department of Chemistry, Deenbandhu Chhotu Ram University of Science and Technology, Murthal-131039, Haryana, India

<sup>2</sup>Centre of Excellence for Energy and Environmental studies, Deenbandhu Chhotu Ram University of Science and Technology, Murthal-131039, Haryana, India

<sup>3</sup>Department of Material Science and Nanotechnology, Deenbandhu Chhotu Ram University of Science and Technology, Murthal-131039, Haryana, India

\*Corresponding Author Email: [sumanjakhar.chem@dcrustm.org](mailto:sumanjakhar.chem@dcrustm.org)

Orcid iD: <http://orcid.org/0000-0002-9496-1173>

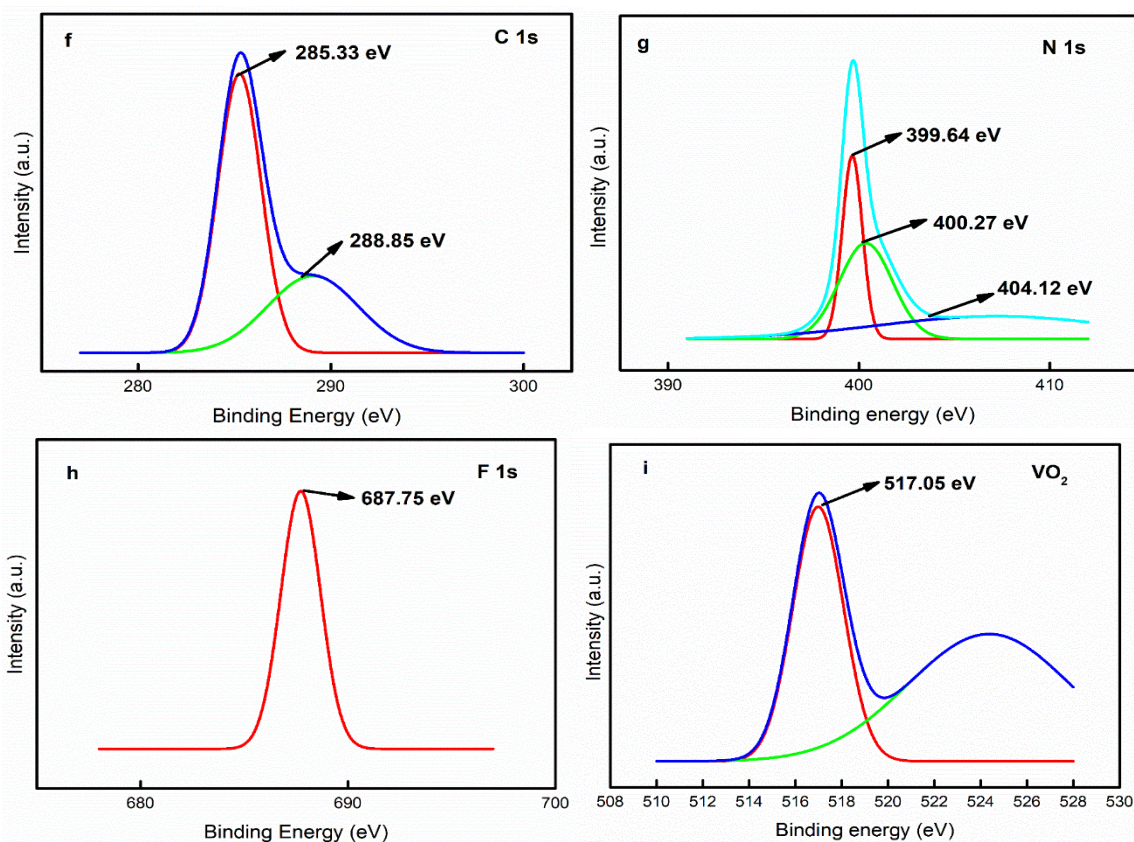

**Fig. S1.(f), (g), (h), (i) The XPS spectrum of electrode PGV0.3 after exploring its electrochemical application.**

Fig.S2. (a) CV curves of PGV0.1, PGV0.2, PGV0.3, PGV0.4 in two electrode system; (b) CV curves of PGV0.3 at different mV/s in two electrode system; (c) GCD of PPY, VO<sub>2</sub> (D), PG, PGV0.1, PGV0.2, PGV0.3, PGV0.4 in two electrode system; (d) GCD of PGV0.3 at the various current density; (e) Ragone plot of PGV0.3 in two electrode system.

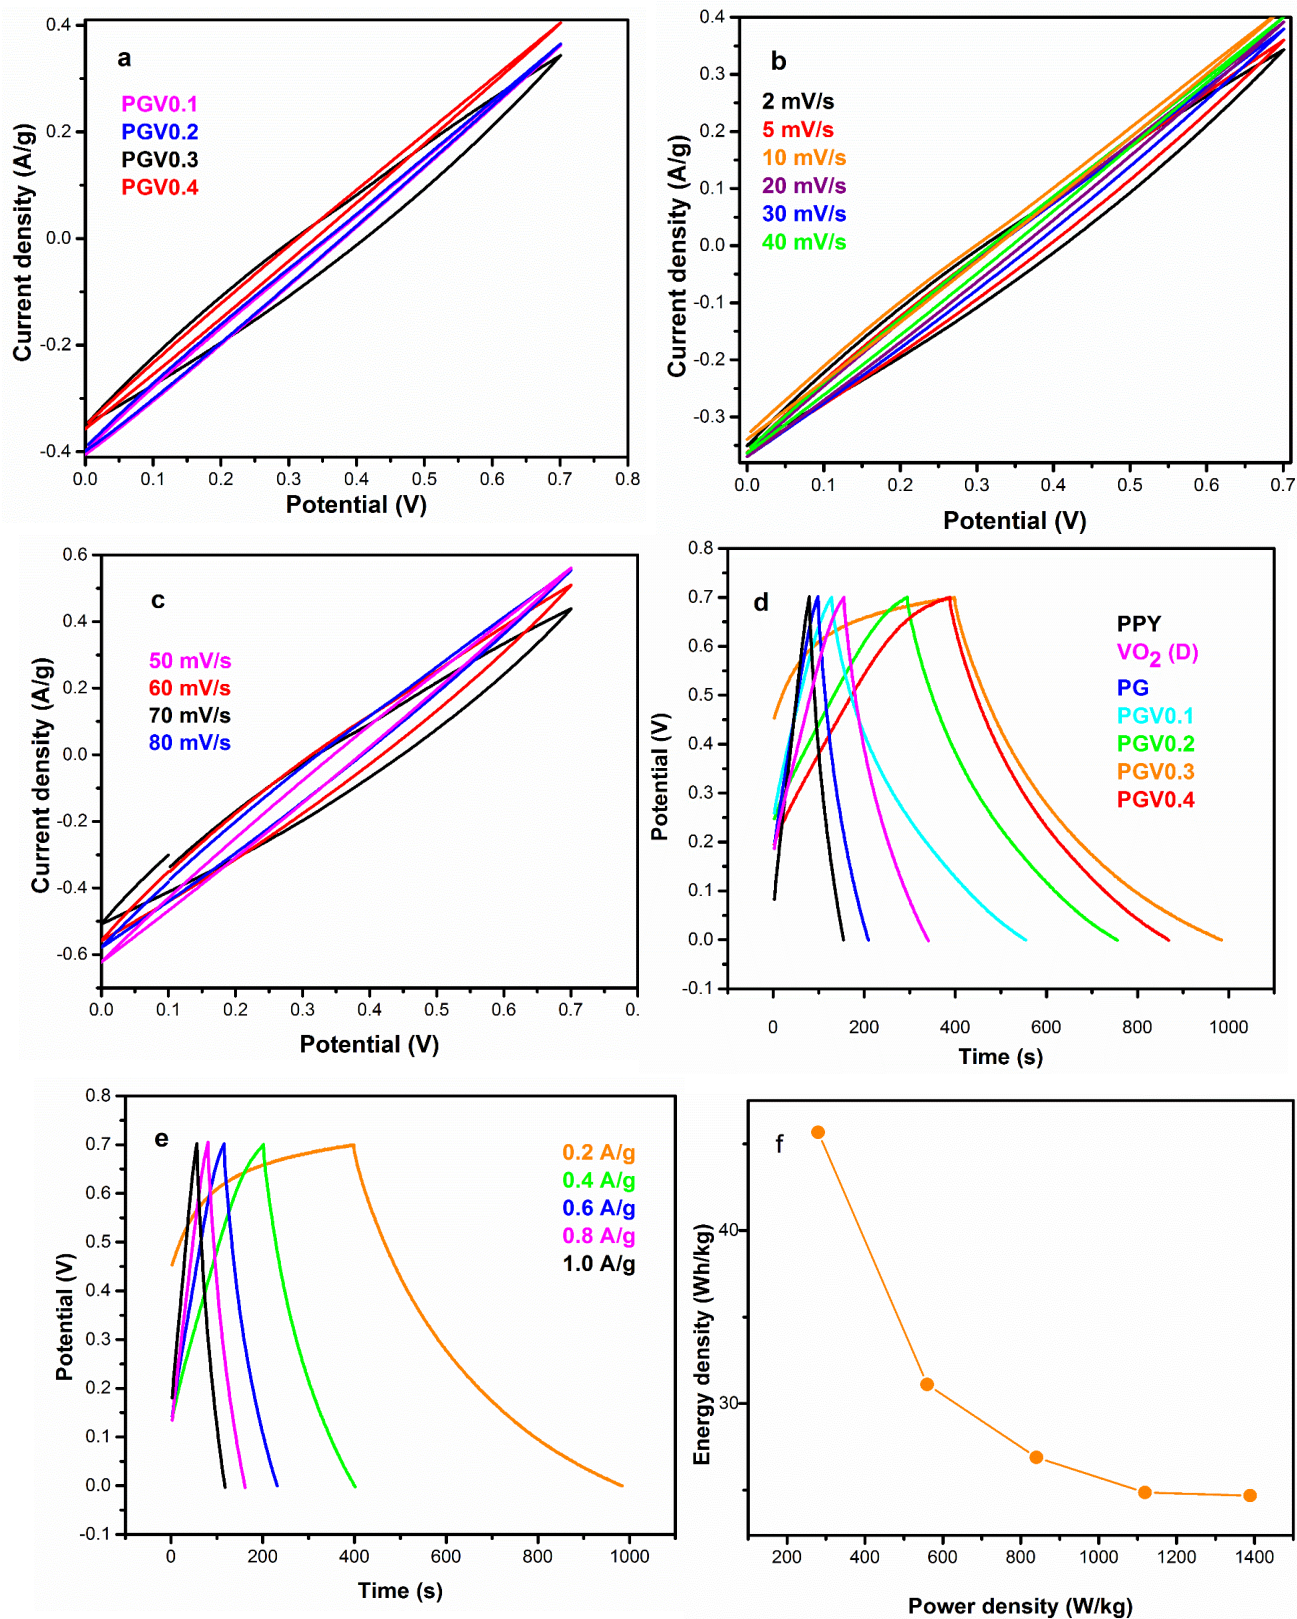

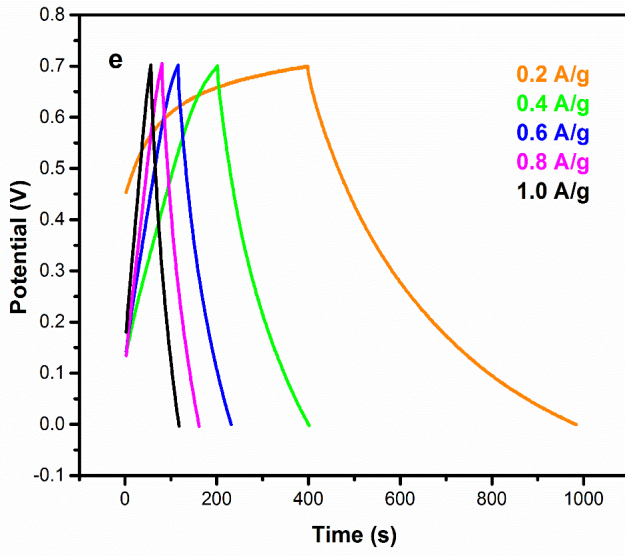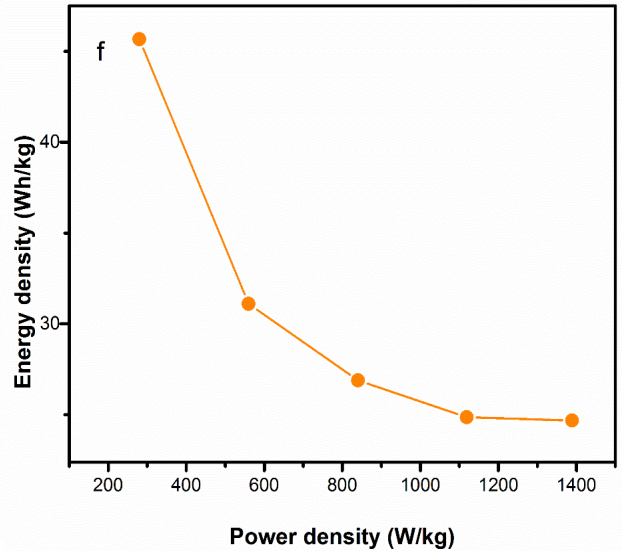

Supplement: d2nj02401b1.pdf [file d2nj02401b1.pdf]
